# Supplementary material for: Risk Balancing of Cold Ischemic Time against Night Shift Surgery Possibly Reduces Rates of Reoperation and Perioperative Graft Loss
Source: Hindawi journal article supplement (doi:10.1155/2017/5362704), 2017-01-01
Supplement: f1 [file 5362704.f1.pdf]

a

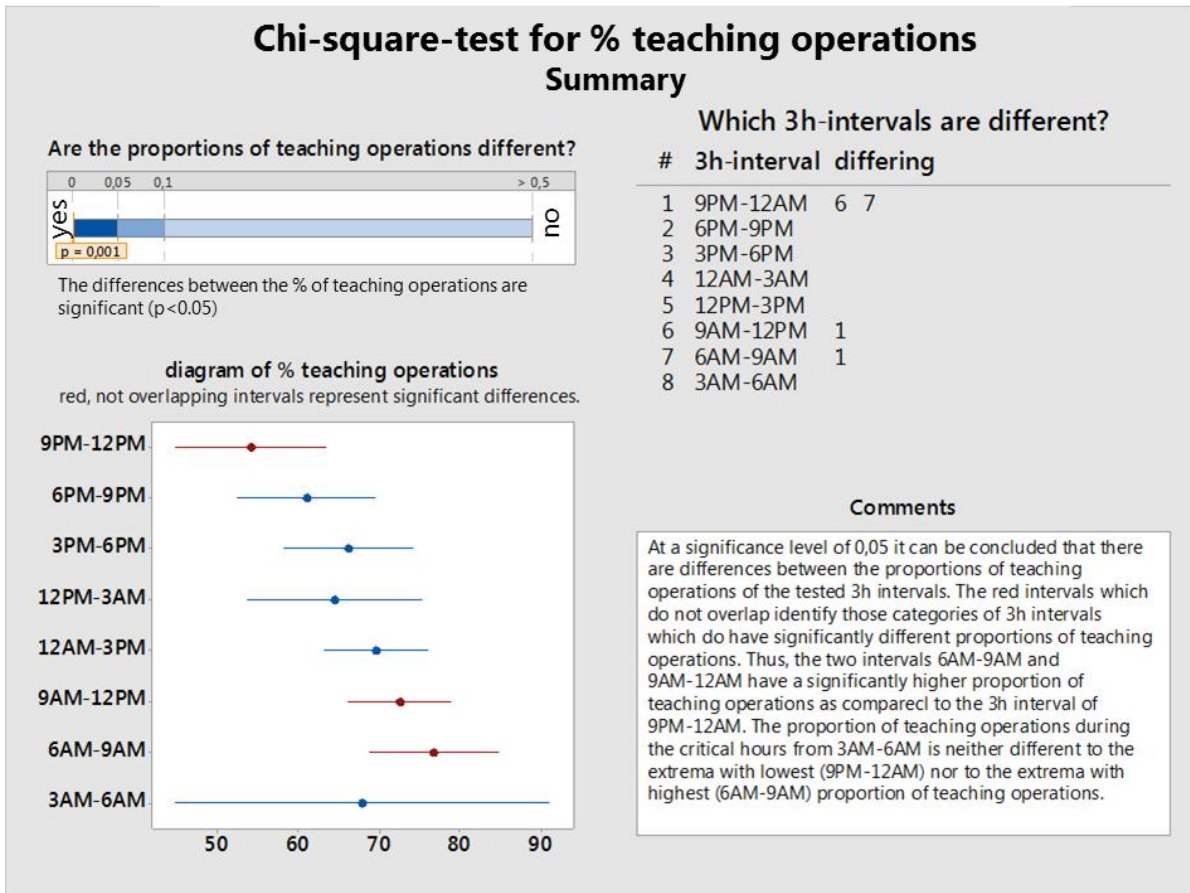

b

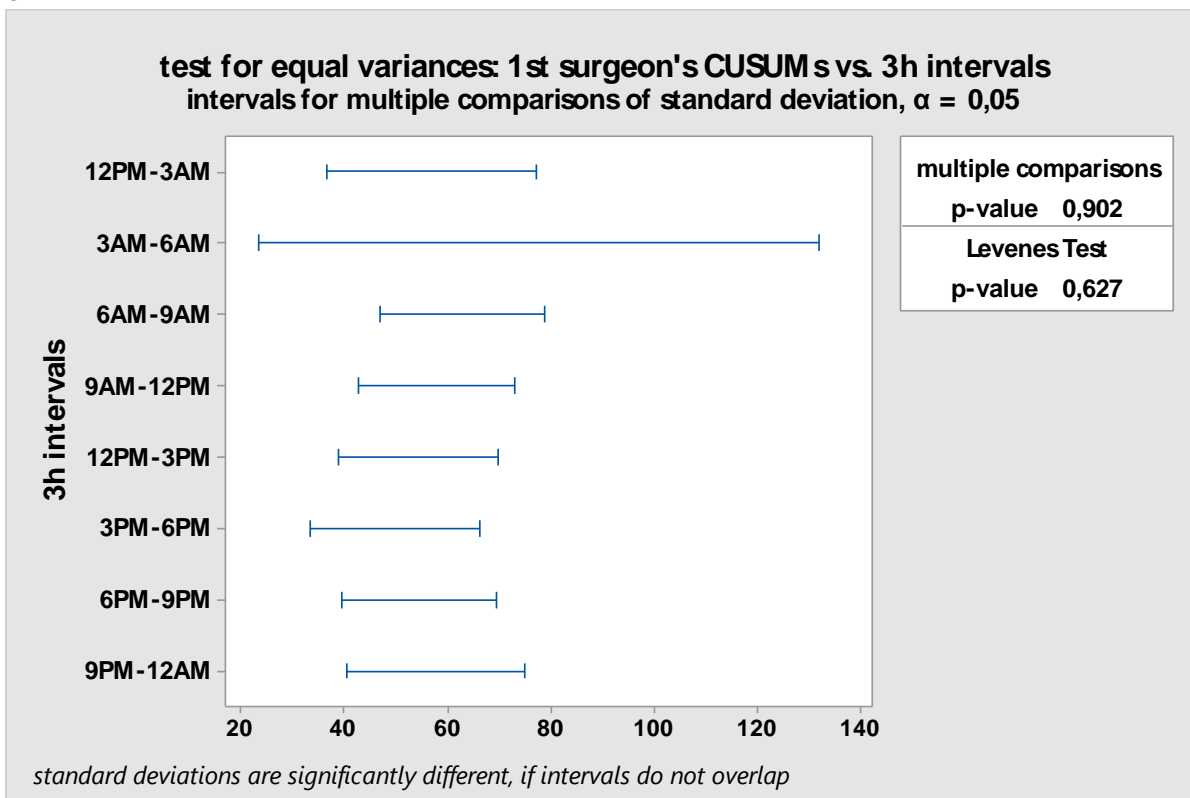

**Supplemental Table:** Detailed donor and recipient related in- and output data of the 25 individuals transplanted between 3AM-6AM in comparison to patients transplanted outside the 3AM-6AM time interval.

| Pat. #                     | DONOR CRITERIA   |       |              |                   |                         |                        |                 |                      | RECIPIENT CRITERIA |       |           |            |           |                 |              |                 |                        |                                          |                        |                       |     |
|----------------------------|------------------|-------|--------------|-------------------|-------------------------|------------------------|-----------------|----------------------|--------------------|-------|-----------|------------|-----------|-----------------|--------------|-----------------|------------------------|------------------------------------------|------------------------|-----------------------|-----|
|                            | age [yrs.]       | BMI   | Urea mmol /l | Crea $\mu$ mol /l | Na <sup>+</sup> mmol /l | K <sup>+</sup> mmol /l | urine /24h [ml] | urine last hour [ml] | age [yrs.]         | BMI   | OT [min.] | CIT [min.] | AT [min.] | > 1 art. Anast. | ureter stent | 1st Surg. Cusum | reoperation due to ... | perioperative graft loss surgery related | postoperative dialysis | discharge on dialysis |     |
| inside 3AM - 6AM (n=25)    | 1                | 56    | 25           | 3,1               | 146                     | 160                    | 4,8             | 4740                 | 22                 | 63    | 19        | 130        | NV        | NV              | no           | no              | 4                      | ureter necr.                             | -                      | yes                   | yes |
|                            | 2                | 41    | 26           | 3,9               | 66                      | 159                    | 3,3             | 6500                 | 500                | 41    | 26        | 130        | 2170      | NV              | no           | no              | NV                     | -                                        | -                      | yes                   | -   |
|                            | 3                | 35    | 25           | 4,1               | 74                      | 145                    | 4,2             | 5000                 | 250                | 55    | 21        | 55         | 1150      | NV              | no           | no              | 11                     | bleeding                                 | -                      | -                     | -   |
|                            | 4                | 37    | 24           | NV                | 106                     | 149                    | 3,6             | 2800                 | 40                 | 61    | 26        | 95         | 1365      | 28              | no           | yes             | 50                     | -                                        | -                      | yes                   | -   |
|                            | 5                | 48    | 21           | 5,4               | 118                     | 162                    | 4,2             | 5200                 | 1100               | 61    | 28        | 119        | 1512      | 29              | no           | no              | 35                     | -                                        | -                      | -                     | -   |
|                            | 6                | 7     | 15           | 15                | 62                      | 147                    | 3,6             | 1500                 | 50                 | 65    | 29        | 115        | 1674      | 25              | no           | yes             | 93                     | -                                        | -                      | -                     | -   |
|                            | 7                | 55    | 23           | 7,5               | 66                      | 136                    | 3,5             | NV                   | NV                 | 71    | 20        | 105        | 1863      | 30              | no           | no              | 21                     | -                                        | -                      | -                     | -   |
|                            | 8                | 61    | 26           | 6                 | 133                     | 136                    | 3               | NV                   | 50                 | 65    | 28        | 65         | 948       | 21              | no           | no              | 29                     | bleeding                                 | -                      | yes                   | -   |
|                            | 9                | 61    | 26           | 6                 | 133                     | 136                    | 3               | NV                   | 50                 | 58    | 28        | 75         | 1132      | 27              | no           | yes             | 28                     | art. diss.                               | yes                    | yes                   | yes |
|                            | 10               | 65    | 33           | 2,7               | 71                      | 158                    | 4,3             | 2700                 | 120                | 65    | 23        | 146        | 695       | 35              | no           | yes             | 20                     | -                                        | -                      | -                     | -   |
|                            | 11               | 17    | 25           | 4,5               | 5                       | 130                    | 4               | 2860                 | 60                 | 37    | 22        | 64         | 743       | 17              | no           | yes             | 235                    | -                                        | -                      | -                     | -   |
|                            | 12               | 69    | 23           | 5,3               | 78                      | 142                    | 4,3             | 2560                 | 50                 | 70    | 23        | 109        | 396       | 26              | no           | yes             | 70                     | -                                        | -                      | -                     | -   |
|                            | 13               | 76    | 24           | 4,4               | 58                      | 135                    | 4               | 2000                 | 50                 | 41    | 24        | 96         | 676       | 24              | no           | yes             | 47                     | -                                        | -                      | -                     | -   |
|                            | 14               | 15    | 21           | 2,1               | 66                      | 158                    | 3,6             | 3370                 | 100                | 42    | 20        | 105        | 341       | 31              | no           | yes             | 14                     | -                                        | -                      | -                     | -   |
|                            | 15               | 68    | 25           | 3,7               | 83                      | 146                    | 3,9             | 5660                 | 150                | 68    | 30        | 140        | 352       | 26              | no           | yes             | 26                     | -                                        | -                      | -                     | -   |
|                            | 16               | 50    | 27           | 5,3               | 55                      | 132                    | 3,9             | 2500                 | 100                | 55    | 25        | 180        | 1752      | 94              | yes          | yes             | 17                     | -                                        | -                      | -                     | -   |
|                            | 17               | 59    | 24           | 6                 | 78                      | 177                    | 3,9             | 5500                 | 500                | 55    | 31        | 160        | 525       | 22              | no           | yes             | 118                    | INF                                      | no                     | yes                   | yes |
|                            | 18               | 55    | 23           | 2,7               | 44                      | 146                    | 4,6             | 4600                 | 320                | 41    | 25        | 102        | 314       | 24              | no           | yes             | 16                     | colon perf.                              | yes                    | yes                   | yes |
|                            | 19               | 64    | 27           | 3,8               | 147                     | 145                    | 6,1             | 6200                 | 400                | 52    | 30        | 75         | 447       | 27              | no           | yes             | 43                     | -                                        | -                      | -                     | -   |
|                            | 20               | 75    | 24           | 4,3               | 53                      | 154                    | 5,5             | 3960                 | 220                | 70    | 21        | 94         | 618       | 34              | no           | yes             | 116                    | -                                        | -                      | -                     | -   |
|                            | 21               | 77    | 29           | 7,7               | 106                     | 146                    | 4,3             | 3100                 | 100                | 65    | 30        | 320        | 854       | 27              | no           | yes             | 96                     | ven. thromb.                             | yes                    | yes                   | yes |
|                            | 22               | 72    | 26           | 6,8               | 56                      | 143                    | 4,2             | 4924                 | 200                | 69    | 24        | 97         | 306       | 24              | no           | yes             | 100                    | -                                        | -                      | -                     | -   |
|                            | 23               | 63    | 37           | 8,2               | 154                     | 150                    | 3,8             | 3800                 | 120                | 56    | 30        | 220        | 707       | 48              | no           | yes             | 89                     | wound dehisc.                            | -                      | yes                   | -   |
|                            | 24               | 61    | 29           | 8,2               | 180                     | 147                    | 4,5             | 5640                 | 400                | 51    | 30        | 116        | 785       | 39              | no           | yes             | 21                     | -                                        | -                      | yes                   | -   |
|                            | 25               | 65    | 24           | 3,3               | 50                      | 161                    | 3,5             | 3700                 | 100                | 72    | 23        | 99         | 343       | 42              | yes          | yes             | 65                     | -                                        | -                      | -                     | -   |
| Mean                       | 54,1             | 25,3  | 5,4          | 87,5              | 149                     | 4,1                    | 3982            | 210,5                | 58                 | 25,4  | 120       | 902,8      | 31,8      | -               | -            | 56,8            | -                      | -                                        | -                      | -                     |     |
| Median                     | 61               | 24,8  | 4,9          | 74,0              | 147                     | 4,0                    | 3800            | 110                  | 61                 | 25    | 105       | 725        | 27        | -               | -            | 39              | -                      | -                                        | -                      | -                     |     |
| SD                         | 18,7             | 4,0   | 2,6          | 41,2              | 9,7                     | 0,7                    | 1403            | 235,3                | 11                 | 3,7   | 54,8      | 541,7      | 15,3      | -               | -            | 52              | -                      | -                                        | -                      | -                     |     |
| %                          | -                | -     | -            | -                 | -                       | -                      | -               | -                    | -                  | -     | -         | -          | -         | 8               | 76           | -               | 32                     | 12                                       | 50                     | 25                    |     |
| Anderson-Darling           | 0,006            | 0,005 | 0,208        | 0,005             | 0,337                   | 0,902                  | 0,297           | 0,005                | 0,063              | 0,161 | 0,005     | 0,018      | 0,005     | -               | -            | 0,182           | -                      | -                                        | -                      | -                     |     |
| outside 3AM - 6AM (n=1237) | Mean             | 52    | 25,9         | 7,9               | 106                     | 148                    | 4,3             | 4330                 | 191                | 54    | 25        | 130        | 917       | 36              | -            | -               | 46                     | -                                        | -                      | -                     | -   |
|                            | Median           | 53    | 25,4         | 5,3               | 77                      | 147                    | 4,1             | 3800                 | 150                | 55    | 25        | 127        | 860       | 35              | -            | -               | 28                     | -                                        | -                      | -                     | -   |
|                            | SD               | 16,2  | 4,1          | 14,5              | 297                     | 9,5                    | 4,9             | 3235                 | 220                | 13    | 3,8       | 35         | 367       | 12,5            | -            | -               | 53,4                   | -                                        | -                      | -                     | -   |
|                            | %                | -     | -            | -                 | -                       | -                      | -               | -                    | -                  | -     | -         | -          | -         | -               | 10           | 70              | -                      | 17                                       | 1,4                    | 35                    | 11  |
|                            | Anderson-Darling | 0,005 | 0,005        | 0,005             | 0,005                   | 0,005                  | 0,005           | 0,005                | 0,005              | 0,005 | 0,005     | 0,005      | 0,005     | 0,005           | -            | -               | <0,005                 | -                                        | -                      | -                     | -   |
| Levens's Test              | 0,734            | 0,713 | 0,277        | 0,735             | 0,601                   | 0,83                   | 0,398           | 0,263                | 0,239              | 0,840 | 0,104     | 0,004      | 0,452     | -               | -            | 0,945           | -                      | -                                        | -                      | -                     |     |
| Fisher's Test              | -                | -     | -            | -                 | -                       | -                      | -               | -                    | -                  | -     | -         | -          | -         | 1,0             | 0,661        | -               | 0,060                  | 0,007                                    | 0,237                  | 0,056                 |     |

**Legend to supplemental table:**

Shown are the detailed data of donor and recipient related covariables of the 25 individuals that were transplanted between 3AM-6AM as well as proportions and distributions of the corresponding data of all patients that were transplanted outside the 3AM-6AM time interval. Normality of distribution of continuous data was analyzed with the Anderson-Darling Test ( $p < 0.05$  indicated a non-normal distribution of data). The proportions of categorial variables and distribution of continuous in- and output data were compared between the two groups using the Fisher's exact Test or the Levene's Test were appropriate.

CIT was significantly shorter in the 3AM-6AM interval group (mean=903, median=725, SD=542) as compared to the group of patients that were transplanted outside the 3AM-6AM time interval (mean=917, median=860, SD=367) ( $p=0.004$ , Levene's Test). The rate of *perioperative graft loss due to surgical reasons* was significantly higher in the 3AM-6AM interval group as compared to the group of patients that were transplanted outside the 3AM-6AM time interval (12% vs. 1.4%, Fisher's Exact Test  $p=0.007$ ). The 3AM-6AM interval group also had higher rates of *reoperation* (32% vs 17%) and *discharge on dialysis* (25% vs 11%) as compared to the group of patients that were transplanted outside the 3AM-6AM time interval, but the differences were slightly above the significance level of .05 (Fisher's Exact Test,  $p=0.060$  and  $p=0.056$ , respectively).
